# Supplementary figures and images for: Large-scale data integration framework provides a comprehensive view on glioblastoma multiforme
Source: Springer Nature journal article supplement (doi:10.1186/gm186), 2010-09-07

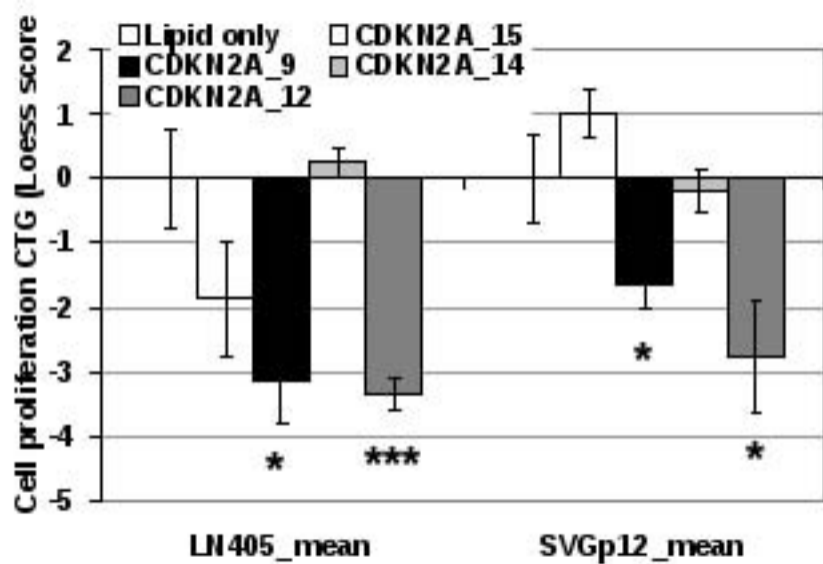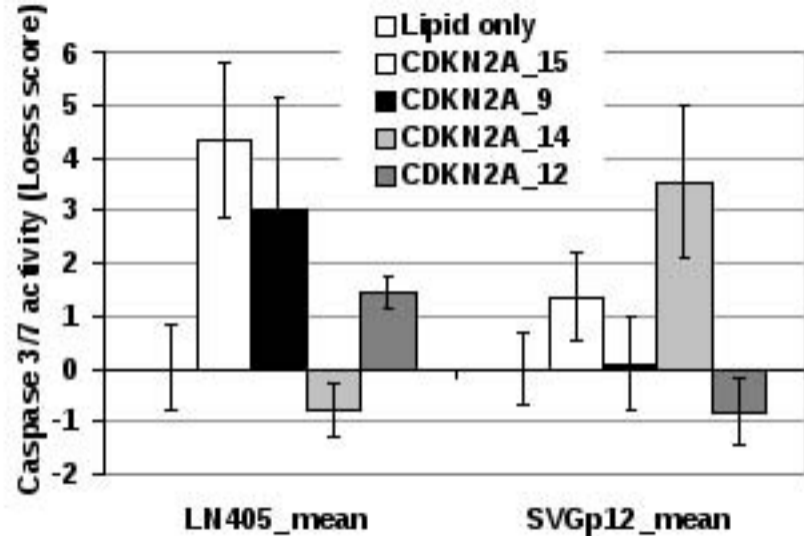

Supplement: Additional file 7 [file gm186-s7.pdf]
